# Supplementary material for: Joint Transcriptional Control of Virulence and Resistance to Antibiotic and Environmental Stress in Acinetobacter baumannii
Source: PubMed Central journal article supplement — mBio. 2015 Nov 10;6(6):e01660-15. doi: 10.1128/mBio.01660-15 (PMC4659468; doi:10.1128/mbio.01660-15), 2015-11-10
Supplement: mbo006152556st1.pdf [file mbo006152556st1.pdf]

Table S1. Genes required for growth in *G. mellonella* larvae

| Annotation                                     | Gene Name    | Description                                                                | Read Ratio (Gm/LB) |
|------------------------------------------------|--------------|----------------------------------------------------------------------------|--------------------|
| <b>Nutrient Acquisition/Metabolism</b>         |              |                                                                            |                    |
| <i>Micronutrient Acquisition</i>               |              |                                                                            |                    |
| ABUW_1173                                      | <i>bauD</i>  | ferric acinetobactin transport system permease                             | 0.0119             |
| ABUW_1174                                      | <i>bauC</i>  | ferric acinetobactin transport system permease                             | 0.0976             |
| ABUW_1176                                      | <i>bauB</i>  | ferric acinetobactin transport system periplasmic binding protein          | 0.0472             |
| ABUW_1177                                      | <i>bauA</i>  | ferric acinetobactin receptor                                              | 0.0111             |
| ABUW_1655                                      | -            | TonB-dependent siderophore receptor                                        | 0.0727             |
| ABUW_1864                                      | -            | 2Fe-2S iron-sulfur cluster binding domain protein                          | 0.0783             |
| ABUW_2232                                      | -            | biopolymer transport protein ExbD/ToIR                                     | 0.0642             |
| ABUW_2917                                      | <i>yhgl</i>  | IscR-regulated protein Yhgl                                                | 0                  |
| ABUW_3740                                      | <i>znuA</i>  | high affinity Zn transport protein                                         | 0.0312             |
| ABUW_3741                                      | <i>zur</i>   | transcriptional regulator, Fur family                                      | 0.0730             |
| ABUW_3742                                      | <i>znuC</i>  | zinc import ATP-binding protein ZnuC                                       | 0.0685             |
| ABUW_3743                                      | <i>znuB</i>  | high affinity Zn transport protein                                         | 0.0449             |
| <i>Amino Acid Transport/Metabolism</i>         |              |                                                                            |                    |
| ABUW_1239                                      | <i>alzC</i>  | branched-chain amino acid permease                                         | 0.0985             |
| ABUW_1240                                      | <i>alzD</i>  | branched chain amino acid transporter                                      | 0.0924             |
| ABUW_1341                                      | <i>hisM</i>  | histidine transport system permease protein HisM                           | 0.0947             |
| ABUW_1726                                      | -            | D-amino acid dehydrogenase 3 small subunit                                 | 0.0741             |
| ABUW_1816                                      | <i>aro1</i>  | 3-deoxy-7-phosphoheptulonate synthase                                      | 0.0794             |
| ABUW_1857                                      | -            | Glu-tRNA amidotransferase                                                  | 0.0986             |
| ABUW_2221                                      | <i>gsiA</i>  | glutathione import ATP-binding protein GsiA                                | 0.0877             |
| ABUW_2222                                      | -            | ABC-type dipeptide/oligopeptide/nickel transport system permease component | 0.0748             |
| ABUW_2330                                      | <i>gltL</i>  | glutamate/aspartate transport ATP-binding protein GltL                     | 0.0931             |
| ABUW_2332                                      | <i>gltJ</i>  | glutamate/aspartate transport system permease protein GltJ                 | 0.0850             |
| ABUW_2339                                      | <i>metQ2</i> | D-methionine transport protein                                             | 0.0977             |
| ABUW_2418                                      | -            | lysine exporter protein                                                    | 0.0955             |
| ABUW_2424                                      | -            | ABC-type amino acid transport system                                       | 0.0686             |
| ABUW_2430                                      | -            | transporter, LysE family                                                   | 0.0950             |
| ABUW_2691                                      | -            | transporter LysE family                                                    | 0.0585             |
| ABUW_2798                                      | -            | D-serine/D-alanine/glycine transporter                                     | 0.0727             |
| <i>Cysteine Metabolism/Sulfur Assimilation</i> |              |                                                                            |                    |
| ABUW_0643                                      | <i>cysI</i>  | sulfite reductase                                                          | 0.0217             |
| ABUW_0722                                      | <i>cysH</i>  | phosphoadenosine phosphosulfate reductase                                  | 0                  |
| ABUW_0853                                      | <i>cobA</i>  | uroporphyrin-III C-methyltransferase                                       | 0                  |
| ABUW_1760                                      | -            | sulfate permease                                                           | 0.0959             |
| ABUW_1941                                      | -            | TauE-like transmembrane protein (probable)                                 | 0                  |

Table S1. Genes required for growth in *G. mellonella* larvae (continued)

| Annotation | Gene Name    | Description                                               | Read Ratio (Gm/LB) |
|------------|--------------|-----------------------------------------------------------|--------------------|
|            |              | pseudogene)                                               |                    |
| ABUW_2218  | <i>cysQ</i>  | 3'(2'),5'-bisphosphate nucleotidase                       | 0.0503             |
| ABUW_2362  | <i>cysE</i>  | serine acetyltransferase                                  | 0.0361             |
| ABUW_2895  | <i>cysN</i>  | sulfate adenylyltransferase subunit 1                     | 0                  |
| ABUW_2896  | <i>cysD</i>  | sulfate adenylyltransferase subunit 2                     | 0                  |
|            |              | <i>Aromatic Hydrocarbon Metabolism</i>                    |                    |
| ABUW_1835  | <i>pcaD</i>  | 3-oxoadipate enol-lactonase                               | 0.0469             |
| ABUW_1837  | <i>pcaC</i>  | 4-carboxymuconolactone decarboxylase                      | 0.0652             |
| ABUW_1854  | -            | benzoate transport porin BenP                             | 0.0305             |
| ABUW_2090  | -            | 4-hydroxybenzoate transporter                             | 0.0909             |
| ABUW_2349  | -            | 4-oxalocrotonate tautomerase                              | 0.0086             |
| ABUW_2374  | -            | isochorismatase hydrolase                                 | 0.0631             |
| ABUW_2523  | <i>paal1</i> | thioesterase domain protein                               | 0.0069             |
| ABUW_2524  | <i>paaY</i>  | phenylacetic acid degradation protein PaaY                | 0.0934             |
|            |              | <i>Lipid Metabolism</i>                                   |                    |
| ABUW_0091  | <i>pgpA</i>  | phosphatidylglycerophosphatase A                          | 0.0514             |
| ABUW_0590  | -            | putative polysaccharide deacetylase                       | 0                  |
| ABUW_0593  | -            | glycosyl hydrolase family 43 domain-containing protein    | 0.0287             |
| ABUW_1438  | -            | acyltransferase 3 domain-containing protein               | 0.0588             |
| ABUW_1509  | <i>desC</i>  | delta-9 acyl-lipid desaturase 1                           | 0.0826             |
| ABUW_1512  | <i>cfa</i>   | cyclopropane-fatty-acyl-phospholipid synthase             | 0.0761             |
| ABUW_1636  | -            | short chain dehydrogenase                                 | 0.0770             |
| ABUW_1637  | -            | oxidoreductase short-chain dehydrogenase/reductase family | 0.0971             |
| ABUW_2193  | -            | acyl-CoA dehydrogenase                                    | 0.0793             |
| ABUW_2450  | -            | long-chain fatty-acid-CoA ligase                          | 0.0933             |
| ABUW_2454  | <i>mgh</i>   | 3-methylglutaconyl-CoA hydratase                          | 0.0810             |
| ABUW_2461  | -            | thioesterase superfamily protein                          | 0.0515             |
|            |              | <i>Secondary Metabolite/Cofactor/Coenzyme Synthesis</i>   |                    |
| ABUW_0379  | <i>dxs</i>   | 1-deoxy-D-xylulose-5-phosphate synthase                   | 0.0992             |
| ABUW_1228  | <i>lipA1</i> | lipoic acid synthetase                                    | 0                  |
| ABUW_1710  | -            | thiamine S/molybdopterin converting factor subunit 1      | 0                  |
| ABUW_1711  | <i>moaE</i>  | molybdopterin converting factor, subunit 2                | 0.0092             |
| ABUW_1713  | -            | molybdopterin biosynthesis protein                        | 0.0857             |
| ABUW_1904  | -            | antibiotic biosynthesis monooxygenase                     | 0.0931             |
| ABUW_2132  | <i>lipA2</i> | lipoic acid synthetase                                    | 0.0288             |
| ABUW_2171  | <i>cobS</i>  | cobalamin 5'-phosphate synthase                           | 0.0804             |
| ABUW_2226  | -            | heme-binding protein A                                    | 0.0656             |
| ABUW_2395  | <i>madL</i>  | malonate transporter, MadL subunit                        | 0.0103             |
| ABUW_2449  | -            | putative SAM-dependent methyltransferase                  | 0.0771             |

Table S1. Genes required for growth in *G. mellonella* larvae (continued)

| Annotation                         | Gene Name     | Description                                                       | Read Ratio (Gm/LB) |
|------------------------------------|---------------|-------------------------------------------------------------------|--------------------|
| ABUW_3650                          | <i>ribE</i>   | riboflavin synthase, alpha subunit                                | 0                  |
| <b>Cell Envelope/Membrane/Wall</b> |               |                                                                   |                    |
| ABUW_2626                          | -             | neuraminidase domain-containing protein                           | 0.0511             |
| ABUW_2679                          | -             | hypothetical protein                                              | 0                  |
| ABUW_2692                          | -             | hypothetical protein (probable pseudogene)                        | 0.0476             |
| ABUW_2898                          | -             | hypothetical protein                                              | 0                  |
| ABUW_3360                          | <i>lptE</i>   | lipopolysaccharide assembly lptE                                  | 0                  |
| ABUW_3447                          | <i>lpxL</i>   | lipid A biosynthesis acyltransferase                              | 0                  |
| ABUW_3448                          | <i>lptB</i>   | glycosyl transferase, group 1                                     | 0.0248             |
| ABUW_3638                          | <i>pbpG</i>   | D-alanyl-D-alanine carboxypeptidase family protein                | 0                  |
| ABUW_3820                          | -             | nucleotide sugar epimerase/dehydratase                            | 0.0327             |
| ABUW_3821                          | -             | Spore coat polysaccharide biosynthesis protein spsC               | 0.0144             |
| ABUW_3822                          | -             | Bacterial transferase hexapeptide (three repeats) family protein  | 0                  |
| ABUW_3823                          | -             | putative UDP-galactose phosphate transferase (WeeH)               | 0                  |
| ABUW_3824                          | -             | family 1 glycosyl transferase                                     | 0.0056             |
| ABUW_3825                          | -             | hypothetical protein                                              | 0                  |
| ABUW_3826                          | -             | family 1 glycosyl transferase                                     | 0.0869             |
| ABUW_3828                          | -             | UDP-glucose/GDP-mannose dehydrogenase family protein              | 0.0535             |
| ABUW_3830                          | -             | UDP-glucose/GDP-mannose dehydrogenase                             | 0.0384             |
| ABUW_3831                          | <i>wza</i>    | polysaccharide export protein                                     | 0.0133             |
| ABUW_3832                          | <i>ptp</i>    | protein-tyrosine-phosphatase ptp                                  | 0                  |
| ABUW_3833                          | <i>ptk</i>    | tyrosine-protein kinase ptk                                       | 0                  |
| <b>Stress Response Genes</b>       |               |                                                                   |                    |
| ABUW_0655                          | <i>typA</i>   | GTP-binding protein TypA/BipA                                     | 0.0223             |
| ABUW_1447                          | -             | M48 family peptidase                                              | 0.0042             |
| ABUW_1501                          | <i>pqiA-2</i> | paraquat-inducible protein A                                      | 0.0768             |
| ABUW_1595                          | <i>kef</i>    | ion transport protein                                             | 0.0666             |
| ABUW_1648                          | -             | mechanosensitive ion channel family protein                       | 0.0658             |
| ABUW_1740                          | <i>rseP</i>   | peptidase M50, putative membrane-associated zinc metallopeptidase | 0.0279             |
| ABUW_1763                          | -             | UspA domain protein                                               | 0                  |
| ABUW_1804                          | <i>trkH</i>   | K <sup>+</sup> uptake system component                            | 0.0639             |
| ABUW_1805                          | <i>trkA</i>   | K <sup>+</sup> uptake system component                            | 0.0822             |
| ABUW_2237                          | -             | monooxygenase, flavin-binding family                              | 0.0838             |
| ABUW_2371                          | <i>arsC</i>   | arsenate reductase                                                | 0.0917             |
| ABUW_2438                          | <i>cinA1</i>  | competence/damage-inducible protein CinA                          | 0                  |
| ABUW_2513                          | <i>csp2</i>   | cold-shock DNA-binding domain protein                             | 0.0095             |
| ABUW_2521                          | -             | UvrD/REP helicase                                                 | 0.0460             |

Table S1. Genes required for growth in *G. mellonella* larvae (continued)

| Annotation                                            | Gene Name   | Description                                     | Read Ratio (Gm/LB) |
|-------------------------------------------------------|-------------|-------------------------------------------------|--------------------|
| ABUW_2590                                             | <i>kefF</i> | NADPH oxidoreductase                            | 0.0405             |
| ABUW_3122                                             | <i>otsB</i> | trehalose-phosphatase                           | 0.0859             |
| <b>Antibiotic Resistance</b>                          |             |                                                 |                    |
| ABUW_0842                                             | <i>adeK</i> | multidrug efflux protein AdeK                   | 0                  |
| ABUW_0843                                             | <i>adeJ</i> | multidrug efflux protein AdeJ                   | 0.0157             |
| ABUW_0844                                             | <i>adel</i> | multidrug efflux protein Adel                   | 0.0154             |
| ABUW_1156                                             | -           | transporter, drug/metabolite exporter family    | 0.0442             |
| ABUW_1499                                             | -           | EamA-like transporter family protein            | 0.0619             |
| ABUW_1520                                             | -           | EamA-like transporter family protein            | 0.0635             |
| ABUW_1673                                             | -           | bacterial transmembrane pair family protein     | 0.0458             |
| ABUW_1851                                             | -           | aminoglycoside phosphotransferase               | 0.0912             |
| ABUW_2123                                             | -           | metallo-beta-lactamase family protein           | 0.0828             |
| ABUW_2550                                             | -           | EamA-like transporter family protein            | 0.0584             |
| <b>Transcriptional Regulation/Signal Transduction</b> |             |                                                 |                    |
| ABUW_1475                                             | -           | transcriptional regulator, AraC family          | 0.0757             |
| ABUW_1515                                             | -           | two-component system response regulator protein | 0.0909             |
| ABUW_1571                                             | -           | transcriptional regulator, AraC family          | 0.0756             |
| ABUW_1645                                             | -           | transcriptional regulator, TetR family          | 0.0437             |
| ABUW_1672                                             | -           | transcriptional regulator, LysR family          | 0.0676             |
| ABUW_1692                                             | -           | transcriptional regulator, TetR family          | 0.0493             |
| ABUW_1755                                             | <i>gigD</i> | transcriptional regulator, AsnC family          | 0                  |
| ABUW_1764                                             | -           | GGDEF family protein                            | 0.0727             |
| ABUW_1768                                             | -           | transcriptional regulator, MarR-family          | 0.0272             |
| ABUW_1848                                             | <i>pcaU</i> | pca operon regulatory protein                   | 0.0852             |
| ABUW_1849                                             | -           | transcriptional regulator, LysR family          | 0.0547             |
| ABUW_1912                                             | -           | hypothetical protein                            | 0.0114             |
| ABUW_1966                                             | -           | transcriptional regulator, LysR family          | 0.0556             |
| ABUW_2074                                             | -           | transcriptional regulator, fur family           | 0.0495             |
| ABUW_2080                                             | -           | transcriptional regulator, ModE family          | 0.0785             |
| ABUW_2196                                             | <i>alkR</i> | transcriptional regulator, AraC family          | 0.0516             |
| ABUW_2208                                             | -           | adenylate/guanylate cyclase                     | 0.0296             |
| ABUW_2236                                             | -           | transcriptional regulator, AraC family          | 0.0550             |
| ABUW_2328                                             | -           | transcriptional regulator, AsnC family          | 0.0873             |
| ABUW_2344                                             | -           | transcriptional regulator, Crp/Fnr family       | 0.0886             |
| ABUW_2368                                             | -           | transcriptional regulator, LysR family          | 0.0817             |
| ABUW_2370                                             | <i>arsR</i> | transcriptional regulator, ArsR family          | 0                  |
| ABUW_2509                                             | -           | hypothetical protein (probable pseudogene)      | 0.0720             |
| ABUW_2520                                             | -           | transcriptional regulator, TetR family          | 0.0666             |
| ABUW_2544                                             | -           | transcriptional regulator, AraC family          | 0.0373             |
| ABUW_2555                                             | <i>soxR</i> | redox-sensitive transcriptional activator SoxR  | 0.0934             |

Table S1. Genes required for growth in *G. mellonella* larvae (continued)

| Annotation                   | Gene Name   | Description                                     | Read Ratio (Gm/LB) |
|------------------------------|-------------|-------------------------------------------------|--------------------|
| ABUW_2563                    | -           | regulatory protein LysR:LysR, substrate-binding | 0.0798             |
| ABUW_2609                    | -           | transcriptional regulator, LysR-type            | 0.0797             |
| ABUW_2741                    | <i>vfr</i>  | cyclic nucleotide-binding domain protein        | 0.0945             |
| ABUW_3161                    | <i>gigC</i> | transcriptional regulator, LysR family          | 0.0007             |
| ABUW_3180                    | <i>bfmS</i> | two-component system sensor kinase protein      | 0                  |
| ABUW_3260                    | <i>gigA</i> | putative two-component response regulator       | 0.0671             |
| <b>Hypothetical Proteins</b> |             |                                                 |                    |
| ABUW_0460                    | -           | hypothetical protein                            | 0                  |
| ABUW_0779                    | -           | hypothetical protein                            | 0.0705             |
| ABUW_0933                    | -           | hypothetical protein                            | 0.0923             |
| ABUW_0934                    | -           | hypothetical protein                            | 0.0733             |
| ABUW_0935                    | -           | hypothetical protein                            | 0.0628             |
| ABUW_0936                    | -           | hypothetical protein                            | 0                  |
| ABUW_1094                    | -           | hypothetical protein                            | 0.0249             |
| ABUW_1095                    | -           | hypothetical protein                            | 0.0825             |
| ABUW_1096                    | -           | hypothetical protein                            | 0.0576             |
| ABUW_1121                    | -           | hypothetical protein                            | 0.0531             |
| ABUW_1160                    | -           | hypothetical protein                            | 0                  |
| ABUW_1212                    | -           | hypothetical protein                            | 0.0900             |
| ABUW_1284                    | -           | hypothetical protein                            | 0.0578             |
| ABUW_1285                    | -           | hypothetical protein                            | 0.0457             |
| ABUW_1287                    | -           | hypothetical protein                            | 0.0648             |
| ABUW_1330                    | -           | hypothetical protein                            | 0.0691             |
| ABUW_1388                    | -           | hypothetical protein                            | 0.0749             |
| ABUW_1390                    | -           | hypothetical protein                            | 0.0558             |
| ABUW_1396                    | -           | hypothetical protein                            | 0.0019             |
| ABUW_1417                    | -           | hypothetical protein                            | 0.0850             |
| ABUW_1439                    | -           | hypothetical protein                            | 0.0696             |
| ABUW_1466                    | -           | hypothetical protein                            | 0.0545             |
| ABUW_1516                    | -           | hypothetical protein                            | 0                  |
| ABUW_1587                    | -           | hypothetical protein                            | 0                  |
| ABUW_1594                    | -           | hypothetical protein                            | 0                  |
| ABUW_1628                    | -           | hypothetical protein                            | 0.0659             |
| ABUW_1629                    | -           | hypothetical protein                            | 0.0988             |
| ABUW_1643                    | -           | hypothetical protein                            | 0.0262             |
| ABUW_1644                    | -           | hypothetical protein                            | 0.0617             |
| ABUW_1651                    | -           | hypothetical protein                            | 0                  |
| ABUW_1652                    | -           | hypothetical protein                            | 0.0418             |
| ABUW_1658                    | -           | hypothetical protein                            | 0                  |
| ABUW_1662                    | -           | hypothetical protein                            | 0                  |

Table S1. Genes required for growth in *G. mellonella* larvae (continued)

| Annotation | Gene Name   | Description                                          | Read Ratio (Gm/LB) |
|------------|-------------|------------------------------------------------------|--------------------|
| ABUW_1681  | -           | hypothetical protein                                 | 0                  |
| ABUW_1691  | -           | PepSY-associated TM helix domain- containing protein | 0.0937             |
| ABUW_1724  | -           | hypothetical protein                                 | 0                  |
| ABUW_1727  | -           | hypothetical protein                                 | 0.0945             |
| ABUW_1753  | -           | hypothetical protein                                 | 0.0733             |
| ABUW_1774  | -           | hypothetical protein                                 | 0.0440             |
| ABUW_1788  | -           | hypothetical protein                                 | 0.0598             |
| ABUW_1828  | -           | hypothetical protein                                 | 0.0546             |
| ABUW_1860  | -           | hypothetical protein                                 | 0.0761             |
| ABUW_1879  | -           | hypothetical protein                                 | 0.0903             |
| ABUW_1901  | -           | hypothetical protein                                 | 0.0458             |
| ABUW_1915  | -           | hypothetical protein                                 | 0.0541             |
| ABUW_1918  | -           | hypothetical protein                                 | 0.0670             |
| ABUW_1960  | -           | hypothetical protein                                 | 0.0662             |
| ABUW_2061  | -           | hypothetical protein                                 | 0.0661             |
| ABUW_2064  | -           | hypothetical protein                                 | 0.0555             |
| ABUW_2065  | -           | hypothetical protein                                 | 0.0688             |
| ABUW_2094  | -           | hypothetical protein                                 | 0.0255             |
| ABUW_2103  | -           | hypothetical protein                                 | 0.0882             |
| ABUW_2107  | -           | hypothetical protein                                 | 0.0721             |
| ABUW_2145  | -           | hypothetical protein                                 | 0.0160             |
| ABUW_2149  | -           | hypothetical protein                                 | 0.0904             |
| ABUW_2156  | -           | hypothetical protein                                 | 0.0784             |
| ABUW_2167  | <i>puiB</i> | hypothetical protein                                 | 0.0753             |
| ABUW_2179  | -           | hypothetical protein                                 | 0.0959             |
| ABUW_2181  | -           | hypothetical protein                                 | 0.0762             |
| ABUW_2219  | -           | hypothetical protein                                 | 0.0692             |
| ABUW_2238  | -           | hypothetical protein                                 | 0.0937             |
| ABUW_2291  | -           | hypothetical protein                                 | 0                  |
| ABUW_2298  | -           | hypothetical protein                                 | 0.0030             |
| ABUW_2308  | -           | hypothetical protein                                 | 0                  |
| ABUW_2309  | -           | hypothetical protein                                 | 0.0441             |
| ABUW_2314  | -           | hypothetical protein                                 | 0                  |
| ABUW_2345  | -           | hypothetical protein                                 | 0.0641             |
| ABUW_2363  | -           | hypothetical protein                                 | 0.0184             |
| ABUW_2372  | -           | hypothetical protein                                 | 0.0637             |
| ABUW_2416  | -           | hypothetical protein                                 | 0.0971             |
| ABUW_2434  | -           | hypothetical protein                                 | 0                  |
| ABUW_2439  | -           | hypothetical protein                                 | 0.0588             |
| ABUW_2441  | -           | hypothetical protein                                 | 0.0530             |

Table S1. Genes required for growth in *G. mellonella* larvae (continued)

| Annotation                    | Gene Name   | Description                                | Read Ratio (Gm/LB) |
|-------------------------------|-------------|--------------------------------------------|--------------------|
| ABUW_2442                     | -           | hypothetical protein                       | 0                  |
| ABUW_2443                     | -           | hypothetical protein                       | 0.0762             |
| ABUW_2444                     | -           | hypothetical protein                       | 0                  |
| ABUW_2463                     | -           | hypothetical protein                       | 0.0845             |
| ABUW_2510                     | -           | hypothetical protein                       | 0                  |
| ABUW_2511                     | -           | hypothetical protein                       | 0                  |
| ABUW_2512                     | -           | hypothetical protein                       | 0                  |
| ABUW_2556                     | -           | hypothetical protein                       | 0                  |
| ABUW_2559                     | -           | hypothetical protein                       | 0.0822             |
| ABUW_2597                     | -           | hypothetical protein (probable pseudogene) | 0.0914             |
| ABUW_2598                     | -           | hypothetical protein                       | 0.0702             |
| ABUW_2600                     | -           | hypothetical protein                       | 0.0351             |
| ABUW_2611                     | -           | hypothetical protein                       | 0.0945             |
| ABUW_2612                     | -           | hypothetical protein                       | 0.0839             |
| ABUW_2624                     | -           | hypothetical protein                       | 0.0477             |
| ABUW_2652                     | -           | hypothetical protein                       | 0.0845             |
| ABUW_2657                     | -           | hypothetical protein (probable pseudogene) | 0.0836             |
| ABUW_2658                     | -           | hypothetical protein                       | 0.0823             |
| ABUW_2674                     | -           | hypothetical protein                       | 0.0788             |
| ABUW_2684                     | -           | phage putative head morphogenesis protein  | 0.0449             |
| ABUW_2685                     | -           | hypothetical protein                       | 0.0044             |
| ABUW_2744                     | -           | putative membrane protein                  | 0.0185             |
| ABUW_2756                     | -           | hypothetical protein                       | 0.0366             |
| ABUW_2795                     | -           | hypothetical protein                       | 0.0152             |
| ABUW_2796                     | -           | hypothetical protein                       | 0.0430             |
| ABUW_2797                     | -           | hypothetical protein                       | 0.0411             |
| ABUW_2811                     | -           | hypothetical protein                       | 0.0407             |
| ABUW_2815                     | -           | hypothetical protein                       | 0.0887             |
| ABUW_2819                     | -           | hypothetical protein                       | 0.0987             |
| ABUW_2833                     | -           | hypothetical protein                       | 0.0987             |
| ABUW_2846                     | -           | hypothetical protein                       | 0.0410             |
| ABUW_2860                     | -           | hypothetical protein                       | 0.0980             |
| ABUW_3003                     | -           | hypothetical protein                       | 0.0558             |
| ABUW_3192                     | -           | hypothetical protein                       | 0                  |
| ABUW_4005                     | -           | hypothetical protein                       | 0                  |
| ABUW_4025                     | -           | hypothetical protein                       | 0.0179             |
| ABUW_4077                     | -           | hypothetical protein                       | 0                  |
| ABUW_4091                     | -           | hypothetical protein                       | 0.0695             |
| <b>Miscellaneous Proteins</b> |             |                                            |                    |
| ABUW_0719                     | <i>cafA</i> | ribonuclease G                             | 0                  |

Table S1. Genes required for growth in *G. mellonella* larvae (continued)

| Annotation | Gene Name    | Description                                      | Read Ratio (Gm/LB) |
|------------|--------------|--------------------------------------------------|--------------------|
| ABUW_1497  | -            | ADP-ribose pyrophosphatase (probable pseudogene) | 0.0703             |
| ABUW_1504  | <i>uraH2</i> | transthyretin                                    | 0.0615             |
| ABUW_1537  | <i>gidA</i>  | glucose inhibited division protein A             | 0.0357             |
| ABUW_1603  | -            | putative acetyltransferase                       | 0.0819             |
| ABUW_1625  | -            | putative helicase                                | 0.0743             |
| ABUW_1632  | -            | PapD-like P pilus assembly protein               | 0.0530             |
| ABUW_1654  | -            | acetyltransferase, gnat family                   | 0.0479             |
| ABUW_1684  | -            | iron-containing alcohol dehydrogenase            | 0.0866             |
| ABUW_1734  | -            | TRAM domain-containing protein                   | 0.0901             |
| ABUW_1747  | <i>recX</i>  | regulatory protein RecX                          | 0.0922             |
| ABUW_1750  | -            | HAD-superfamily hydrolase                        | 0.0969             |
| ABUW_1758  | -            | alpha/beta hydrolase fold-3                      | 0.0912             |
| ABUW_1962  | -            | acetyltransferase (probable pseudogene)          | 0                  |
| ABUW_2066  | <i>acdP</i>  | dipeptidase                                      | 0.0681             |
| ABUW_2177  | -            | HAD-superfamily hydrolase                        | 0.0959             |
| ABUW_2214  | <i>rraA</i>  | regulator of ribonuclease activity A             | 0.0956             |
| ABUW_2217  | -            | phosphoglycerate mutase                          | 0.0739             |
| ABUW_2233  | -            | acetyltransferase, gnat family                   | 0                  |
| ABUW_2235  | -            | AFG1-family ATPase                               | 0.0602             |
| ABUW_2252  | <i>gspG</i>  | general secretion pathway protein G              | 0.0683             |
| ABUW_2262  | <i>spoOJ</i> | chromosome partitioning protein ParB             | 0.0535             |
| ABUW_2268  | <i>surA</i>  | PpiC-type peptidyl-prolyl cis-trans isomerase    | 0.0405             |
| ABUW_2304  | <i>ruvC</i>  | crossover junction endodeoxyribonuclease RuvC    | 0.0930             |
| ABUW_2311  | -            | pili assembly chaperone                          | 0.0403             |
| ABUW_2313  | -            | fimbrial protein                                 | 0.0907             |
| ABUW_2322  | -            | phage integrase                                  | 0.0798             |
| ABUW_2342  | <i>ychF</i>  | GTP-binding protein YchF                         | 0.0085             |
| ABUW_2408  | -            | LrgA family protein                              | 0.0849             |
| ABUW_2558  | -            | acetyltransferase, gnat family                   | 0.0881             |
| ABUW_2592  | -            | urea carboxylase-associated protein 1            | 0.0927             |
| ABUW_2593  | -            | urea carboxylase-associated protein 2            | 0.0777             |
| ABUW_2613  | -            | RHS family protein                               | 0.0765             |
| ABUW_2640  | -            | acetyltransferase                                | 0.0316             |
| ABUW_2678  | -            | 17 kDa surface antigen                           | 0.0675             |
| ABUW_2826  | <i>rnt</i>   | ribonuclease T                                   | 0.0132             |
| ABUW_3083  | <i>smpB</i>  | SsrA-binding protein                             | 0                  |
| ABUW_3385  | <i>prc</i>   | carboxy-protease                                 | 0.0774             |
| ABUW_3589  | <i>rpoC</i>  | DNA-directed RNA polymerase, beta' subunit       | 0.0315             |
| ABUW_3710  | -            | putative acetyltransferase                       | 0.0946             |
| ABUW_3846  | <i>dsbA</i>  | thiol:disulfide interchange protein DsbA         | 0.0764             |



Table S1. Genes required for growth in *G. mellonella* larvae (continued)

| <b>Annotation</b> | <b>Gene Name</b> | <b>Description</b> | <b>Read Ratio (Gm/LB)</b> |
|-------------------|------------------|--------------------|---------------------------|
| ABUW_4023         | -                | Protein incC       | 0                         |
