# Supplementary material for: Joint Transcriptional Control of Virulence and Resistance to Antibiotic and Environmental Stress in Acinetobacter baumannii
Source: PubMed Central journal article supplement — mBio. 2015 Nov 10;6(6):e01660-15. doi: 10.1128/mBio.01660-15 (PMC4659468; doi:10.1128/mbio.01660-15), 2015-11-10
Supplement: mbo006152556st2.pdf [file mbo006152556st2.pdf]

Table S2. Strains &amp; Plasmids used in this study

| Strain or Plasmid                  | Genotype or Description                              | Reference |
|------------------------------------|------------------------------------------------------|-----------|
| <b><i>Acinetobacter baylyi</i></b> |                                                      |           |
| Strain ADP1                        | Wild type strain                                     | [1]       |
| <b><i>A. baumannii</i></b>         |                                                      |           |
| ATCC 17978                         | <i>A. baumannii</i> type strain                      | [2]       |
| Strain AB5075                      | Multidrug resistant clinical isolate                 | [3]       |
| AB5075 $\Delta$ <i>ptk</i>         | AB5075 harboring in-frame deletion of ABUW_3833      | This work |
| AB5075 $\Delta$ <i>kef</i>         | AB5075 harboring in-frame deletion of ABUW_1595      | This work |
| AB5075 $\Delta$ <i>kefF</i>        | AB5075 harboring in-frame deletion of ABUW_2590      | This work |
| AB5075 $\Delta$ <i>mscS</i>        | AB5075 harboring in-frame deletion of ABUW_1648      | This work |
| AB5075 $\Delta$ <i>otsB</i>        | AB5075 harboring in-frame deletion of ABUW_3122      | This work |
| AB5075 <i>rseP</i> ::Tn            | AB5075 harboring a transposon insertion in ABUW_1740 | [4]       |
| AB5075 $\Delta$ <i>trkH</i>        | AB5075 harboring in-frame deletion of ABUW_1804      | This work |
| AB5075 <i>typA</i> ::Tn            | AB5075 harboring a transposon insertion in ABUW_0655 | [4]       |
| AB5075 $\Delta$ <i>uspA</i>        | AB5075 harboring in-frame deletion of ABUW_1763      | This work |
| AB5075 <i>uvrD</i> ::Tn            | AB5075 harboring a transposon insertion in ABUW_2521 | [4]       |
| AB5075 <i>znuB</i> ::Tn            | AB5075 harboring a transposon insertion in ABUW_3743 | [4]       |
| AB5075 $\Delta$ <i>alkR</i>        | AB5075 harboring in-frame deletion of ABUW_2196      | This work |
| AB5075 $\Delta$ 2544               | AB5075 harboring in-frame deletion of ABUW_2544      | This work |
| AB5075 $\Delta$ 2236               | AB5075 harboring in-frame deletion of ABUW_2236      | This work |
| AB5075 $\Delta$ <i>bfmS</i>        | AB5075 harboring in-frame deletion of ABUW_3180      | This work |
| AB5075 $\Delta$ <i>gigA</i>        | AB5075 harboring in-frame deletion of ABUW_3260      | This work |

Table S2. Strains &amp; Plasmids used in this study (continued)

| Strain                      | Description                                                                                                                        | Reference |
|-----------------------------|------------------------------------------------------------------------------------------------------------------------------------|-----------|
| AB5075 $\Delta$ <i>gigB</i> | AB5075 harboring in-frame deletion of ABUW_3261                                                                                    | This work |
| AB5075 $\Delta$ <i>gigC</i> | AB5075 harboring in-frame deletion of ABUW_3161                                                                                    | This work |
| AB5075 $\Delta$ <i>gigD</i> | AB5075 harboring in-frame deletion of ABUW_1755                                                                                    | This work |
| AB5075 $\Delta$ 1966        | AB5075 harboring in-frame deletion of ABUW_1966                                                                                    | This work |
| AB5075 $\Delta$ 2520        | AB5075 harboring in-frame deletion of ABUW_2520                                                                                    | This work |
| AB5075 $\Delta$ <i>zur</i>  | AB5075 harboring in-frame deletion of ABUW_3741                                                                                    | This work |
| AB5075::Tn7                 | AB5075 harboring a hygromycin resistance gene at the Tn7 attachment site                                                           | This work |
| <i>ptk</i> ::Tn7            | AB5075 $\Delta$ <i>ptk</i> harboring the Tn7-hygromycin cassette at the Tn7 attachment site                                        | This work |
| <i>ptk</i> ::Tn7C           | AB5075 $\Delta$ <i>ptk</i> harboring the Tn7-hygromycin cassette and a WT copy of the <i>ptk</i> gene at the Tn7 attachment site   | This work |
| <i>gigC</i> ::Tn7           | AB5075 $\Delta$ <i>gigC</i> harboring the Tn7-hygromycin cassette at the Tn7 attachment site                                       | This work |
| <i>gigC</i> ::Tn7C          | AB5075 $\Delta$ <i>gigC</i> harboring the Tn7-hygromycin cassette and a WT copy of the <i>gigC</i> gene at the Tn7 attachment site | This work |
| <i>gigD</i> ::Tn7           | AB5075 $\Delta$ <i>gigD</i> harboring the Tn7-hygromycin cassette at the Tn7 attachment site                                       | This work |
| <i>gigD</i> ::Tn7C          | AB5075 $\Delta$ <i>gigD</i> harboring the Tn7-hygromycin cassette and a WT copy of the <i>gigD</i> gene at the Tn7 attachment site | This work |
| <i>rseP</i> ::Tn7           | AB5075 <i>rseP</i> ::Tn harboring the Tn7-hygromycin cassette at the Tn7 attachment site                                           | This work |
| <i>rseP</i> ::Tn7C          | AB5075 <i>rseP</i> ::Tn harboring the Tn7-hygromycin cassette and a WT copy of the <i>rseP</i> gene at the Tn7 attachment site     | This work |
| <i>typA</i> ::Tn7           | AB5075 <i>typA</i> ::Tn harboring the Tn7-hygromycin cassette at the Tn7 attachment site                                           | This work |
| <i>typA</i> ::Tn7C          | AB5075 <i>typA</i> ::Tn harboring the Tn7-hygromycin cassette and a WT copy of the <i>typA</i> gene at the Tn7 attachment site     | This work |
| <i>uspA</i> ::Tn7           | AB5075 $\Delta$ <i>uspA</i> harboring the Tn7-hygromycin cassette at the Tn7 attachment site                                       | This work |

Table S2. Strains &amp; Plasmids used in this study (continued)

| Strain                         | Description                                                                                                                                                                                                                        | Reference            |
|--------------------------------|------------------------------------------------------------------------------------------------------------------------------------------------------------------------------------------------------------------------------------|----------------------|
| <i>uspA::Tn7C</i>              | AB5075 $\Delta$ <i>uspA</i> harboring the Tn7-hygromycin cassette and a WT copy of the <i>uspA</i> gene at the Tn7 attachment site                                                                                                 | This work            |
| <b><i>E. coli</i></b>          |                                                                                                                                                                                                                                    |                      |
| DH5 $\alpha$                   | <i>supE44</i> $\Delta$ <i>lacU169</i> ( $\phi$ 80 <i>lacZ</i> $\Delta$ M15) <i>hsdR17 recA1 endA1 gyrA96 thi-1 relA1</i>                                                                                                           | Lab Strain           |
| DH5 $\alpha$ ( $\lambda$ pir)  | DH5 $\alpha$ ( $\lambda$ pir)                                                                                                                                                                                                      | [5]                  |
| LW264                          | LW211Tri <sup>R</sup> (Tn::7 Kn <sup>+</sup> ) by P1 transduction from S17-1, KnS $\lambda$ <sub>imm434</sub>                                                                                                                      | L. A. Wiater         |
| HB101                          | F <sup>-</sup> <i>mcrB mrr hsdS20</i> ( <i>r<sub>B</sub><sup>-</sup> m<sub>B</sub><sup>-</sup>) <i>recA13 leuB6 ara-14 proA2 lacY1 galK2 xyl-5 mtl-1 rpsL20</i>(Sm<sup>R</sup>) <i>glnV44</i> <math>\lambda</math><sup>-</sup></i> | [6]                  |
| <b>Plasmids</b>                |                                                                                                                                                                                                                                    |                      |
| pLAW344                        | <i>sacB</i> MCS <i>oriT</i> (RK2) Cm <sup>R</sup> <i>loxP oriR</i> (ColE1) Amp <sup>R</sup> <i>loxP</i>                                                                                                                            | [7]                  |
| pXDC77                         | <i>oriR</i> (ColE1), Amp <sup>R</sup> , source Tetracycline Resistance gene for pMJG42                                                                                                                                             | Gift, X. Charpentier |
| pMJG42                         | pLAW344 with tetracycline resistance cassette from pXDC77 was inserted in place of Cm <sup>r</sup> gene                                                                                                                            | This Work            |
| pUC18T-miniTn7T-hyg-luciferase | <i>oriR</i> (ColE1), Amp <sup>R</sup> , Hygromycin <sup>R</sup> , luciferase, miniTn7 base vector                                                                                                                                  | [8]                  |
| pMJG111                        | pUC18T-miniTn7T-hyg-luciferase digested with BamHI/HindIII, Filled in with Klenow and self ligated to remove luciferase cassette                                                                                                   | This work            |
| pMMB207                        | Cm <sup>R</sup> , <i>oriR</i> (RSF1010)                                                                                                                                                                                            | [9]                  |
| pLLA14B                        | pGEMTeasy.Tpn Mar – source of apramycin cassette                                                                                                                                                                                   | Gift, X. Charpentier |
| pMJG120                        | pMMB207 was digested with DraI and ligated to the apramycin cassette from pLLA14B                                                                                                                                                  | This Work            |

Table S2. Strains & Plasmids used in this study (continued)

## References

1. Smith MA, Weaver VB, Young DM, Ornston LN. Genes for Chlorogenate and Hydroxycinnamate Catabolism (*hca*) Are Linked to Functionally Related Genes in the *dca-pca-qui-pob-hca* Chromosomal Cluster of *Acinetobacter* sp. Strain ADP1. *Applied and Environmental Microbiology*. 2003;69(1):524-32.
2. Smith MG, Gianoulis TA, Pukatzki S, Mekalanos JJ, Ornston LN, Gerstein M, et al. New insights into *Acinetobacter baumannii* pathogenesis revealed by high-density pyrosequencing and transposon mutagenesis. *Genes & development*. 2007;21(5):601-14.
3. Jacobs AC, Thompson MG, Black CC, Kessler JL, Clark LP, McQueary CN, et al. AB5075, a Highly Virulent Isolate of *Acinetobacter baumannii*, as a Model Strain for the Evaluation of Pathogenesis and Antimicrobial Treatments. *MBio*. 2014;5(3):e01076-14.
4. Gallagher LA, Ramage E, Weiss EJ, Radey M, Hayden HS, Held KG, et al. Resources for genetic and genomic analysis of emerging pathogen *Acinetobacter baumannii*. *J Bacteriol*. 2015.
5. Kolter R, Inuzuka M, Helinski DR. Trans-complementation-dependent replication of a low molecular weight origin fragment from plasmid R6K. *Cell*. 1978;15(4):1199-208.
6. Boyer HW, Roulland-Dussoix D. A complementation analysis of the restriction and modification of DNA in *Escherichia coli*. *J Mol Biol*. 1969;41(3):459-72.

Table S2. Strains & Plasmids used in this study (continued)

7. Wiater LA, Sadosky AB, Shuman HA. Mutagenesis of *Legionella pneumophila* using Tn903 *dll/acZ*: identification of a growth-phase-regulated pigmentation gene. *Molecular microbiology*. 1994;11(4):641-53.
8. Choi KH, Gaynor JB, White KG, Lopez C, Bosio CM, Karkhoff-Schweizer RR, et al. A Tn7-based broad-range bacterial cloning and expression system. *Nature methods*. 2005;2(6):443-8.
9. Morales VM, Backman A, Bagdasarian M. A series of wide-host-range low-copy-number vectors that allow direct screening for recombinants. *Gene*. 1991;97(1):39-47.
