# Supplementary material for: Joint Transcriptional Control of Virulence and Resistance to Antibiotic and Environmental Stress in Acinetobacter baumannii
Source: PubMed Central journal article supplement — mBio. 2015 Nov 10;6(6):e01660-15. doi: 10.1128/mBio.01660-15 (PMC4659468; doi:10.1128/mbio.01660-15), 2015-11-10
Supplement: mbo006152556st3.pdf [file mbo006152556st3.pdf]

Table S3. Oligonucleotides used in this study

| Primer                       | Sequence (5' -> 3')                                             |
|------------------------------|-----------------------------------------------------------------|
| <b>Gene Deletion Primers</b> |                                                                 |
| ABUW_3260 P1                 | ATTTATGCGGCCGCTGCATATTGAATATAGCCTGGCTA                          |
| ABUW_3260 P2                 | TAAGTCGTATATTATGTAATTAATTGATTCTTAAAAGAAGATATGGTAGTCCTTTTTCAA    |
| ABUW_3260 P3                 | TTGAAAAAGGACTACCATATCTTCTTTTAAAGAATCAATTAATTACATAATATACGACTTA   |
| ABUW_3260 P4                 | ATTTATGCGGCCGCGCATCGCCAACCTTGATACAT                             |
| ABUW_3261 P1                 | ATTTATGCGGCCGCCATCCTCTATGATGGATAAAGTGATCTTG                     |
| ABUW_3261 P2                 | TCATATACACATCCAGATTAGCAATAAAGTATAGTGCCATCTCAGACTCAAGAGTCCTTA    |
| ABUW_3261 P3                 | TAAGGACTCTTGAGTCTGAGATGGCACTATACTTTATTGCTAATCTGGATGTGTATATGA    |
| ABUW_3261 P4                 | ATTTATGCGGCCGCGCTGTCTGGCACCTTCTG                                |
| ABUW_2544 P1                 | ATTTATGCGGCCGCGACAGCCTAAACTTGTCTTATCG                           |
| ABUW_2544 P2                 | AATTTTGGGTTGTTTTATACAGCCCAATTTTTTATGAGCTAGAGCGGACAAAGTTATAAC    |
| ABUW_2544 P3                 | GTTATAACTTTGTCCGCTCTAGCTCATAAAAAATTGGGCTGTATAAAACAACCCAAAATT    |
| ABUW_2544 P4                 | ATTTATGCGGCCGCGTCAAGGCTTTGCTTTTGGTGG                            |
| ABUW_2520 P1                 | ATTTATGCGGCCGCGATACAAGAATGGGAGGTATGTTTGGATC                     |
| ABUW_2520 P2                 | TTTACATATAAGCCGTATAGAAGAACAGGCTCAAGTTTGTATTGCTGAGTTTTAAGTA      |
| ABUW_2520 P3                 | TACTTAAACTCAGCAATAACAACTTGAGCCTGTTCTTCTATGACGGCTTATATGTAAA      |
| ABUW_2520 P4                 | ATTTATGCGGCCGCGTACCAAAGATGACGACCAAC                             |
| ABUW_2370 P1                 | ATTTATGCGGCCGCGCATGGTCGCCAGTAAAACGT                             |
| ABUW_2370 P2                 | CTAAATTTTAAAGACGGAAATCTAGGAAGAATCTTCAACAAAATATATTCGTTATTGCAA    |
| ABUW_2370 P3                 | TTGCAATAACGAATATATTTTGTGAAGATTCTTCTAGATTTCCGCTCTTAAAATTTAG      |
| ABUW_2370 P4                 | ATTTATGCGGCCGCGCTACAGCTAAAGCCAACCTCAAAGTT                       |
| ABUW_2236 P1                 | ATTTATGCGGCCGCGCACAAAGTCTGGTGTAAGTTTCTT                         |
| ABUW_2236 P2                 | CACATTAGCTTTTAGCATCAAGAGTTACACTCTTTTATCAATTTCCCTAGACTGAAATGT    |
| ABUW_2236 P3                 | ACATTTAGCTTAGGGAAATTTGATAAAAGAGTGTAACCTTGTATGCTAAAAGCTAATGTG    |
| ABUW_2236 P4                 | ATTTATGCGGCCGCGGAAGTCTGTAAAGTGAGGAACACTACTG                     |
| ABUW_2196 P1                 | ATTTATGCGGCCGCGAGACTAATCCCGTAAAATGCT                            |
| ABUW_2196 P2                 | GCTTCGGCGCTTTTTTAGTTTACGTGATCAATCATTATTTTAAATAA                 |
| ABUW_2196 P3                 | TTTATTAATAATGATTGATGATCACGTAAACTAAAAAGCGCCGAAGC                 |
| ABUW_2196 P4                 | ATTTATGCGGCCGCGGACTGTCATTTGCTCAAGCAG                            |
| ABUW_2074 P1                 | ATTTATGCGGCCGCGTCAAAACACCAAGGCATTAATTGAT                        |
| ABUW_2074 P2                 | CCTTTATTTTATAACAGTTTAAAAGATTTCTTACTGAACCTTAATGTCTAGAAATATAG     |
| ABUW_2074 P3                 | CTATATTTCTAGACATTAAGGTTAGTAAGAAATCTTTTAACTGTTATAAAAAATAAAGG     |
| ABUW_2074 P4                 | ATTTATGCGGCCGCGCTTAAAGTGGTCCAATTTTAGGTATT                       |
| ABUW_3741 P1                 | ATTTATGCGGCCGCGCAATCTTTTCCCGACTTTAGT                            |
| ABUW_3741 P2                 | ATTTAACGAGCTGTGCGGCACAGACATAACCTCAAATTTTTAATGGAATATTAGC         |
| ABUW_3741 P3                 | GCTAATATTCCATTAATAAATTTGAGGTTATGTCTGTGCCGCACAGCTCGTTAAAT        |
| ABUW_3741 P4                 | ATTTATGCGGCCGCGAAGCAAAGCATCGTTTGGTAAAC                          |
| ABUW_1645 P1                 | ATTTATGCGGCCGCGTAACCAAACGAGCCCATACG                             |
| ABUW_1645 P2                 | CCATTATCGGGGCTTTTATTTTAAATAGTTATACCGCTTAAAATAATTTTTTGTG         |
| ABUW_1645 P3                 | CAACAAAAAATTTTAAAGCGGTATAACTATTAATAAATAAAGCCCCGATAATGG          |
| ABUW_1645 P4                 | ATTTATGCGGCCGCGAGCTCATTTATTTACCTGAACTTACCA                      |
| ABUW_1672 P1                 | ATTTATGCGGCCGCGCTTTCTTTCTCTGAAACAGCAGCT                         |
| ABUW_1672 P2                 | TTTAGGTTCTGCATCTAAATTGAAATGATTCTGTCAAAAAAATTGAAAGAACCTGATTGG    |
| ABUW_1672 P3                 | CCAATCAGGTTCTTTCAATTTTTTGTGACAGAATCATTTCAATTTAGATGCAGAACCTAAA   |
| ABUW_1672 P4                 | ATTTATGCGGCCGCGCTGGTCTAACAATCGCTTCT                             |
| ABUW_1692 P1                 | ATTTATGCGGCCGCGATCATCTGCTGCTTCTGAGGTT                           |
| ABUW_1692 P2                 | TTTTAGTCTAGTATTTCAATGTTATTAACGATTTCCCGTAGTAAATCTTTTGAAT         |
| ABUW_1692 P3                 | ATTTCAAAGATTTACTACGGGGAAATCGTTTAAATAACATTGAAATACTAGACTAAAA      |
| ABUW_1692 P4                 | ATTTATGCGGCCGCGGTAATACGCCACTGGTTCC                              |
| ABUW_1755 P1                 | ATTTATGCGGCCGCGCATATCAGCATGCAGGAAAAATATC                        |
| ABUW_1755 P2                 | ACGAGAGTTTTTAAATTTAGCTAAATTTTTTTCGAATTTCCATCCATTTTTTAAATTT      |
| ABUW_1755 P3                 | AAAATTAATAAATATGGATGAAATTCGAAAAATTTTAGCTAAAATTAATAAACTCTCGT     |
| ABUW_1755 P4                 | ATTTATGCGGCCGCGTACATAGGATACGTATTGGCAAACAT                       |
| ABUW_1849 P1                 | ATTTATGCGGCCGCGAGCAGCCATGTTTCTTAAAGTATCCATT                     |
| ABUW_1849 P2                 | TACGATAGAAGCTTAGTAGATCAATTTGCTGATGCATTATTTAATAAAAAATCATTTTCATTC |
| ABUW_1849 P3                 | GAATGAAATGATTTTATTAATAATGCATCAGCAAATTGATCTACTAAGCTTCTATCGTA     |
| ABUW_1849 P4                 | ATTTATGCGGCCGCGCAATGCCAAAATTAATTCTGCCT                          |
| ABUW_1966 P1                 | ATTTATGCGGCCGCGTCTAAGGCTTGAGCAACAGGT                            |
| ABUW_1966 P2                 | TCCAACCATAAGTCTTATGAGCAGTATTTATAAGTATTCAATATAAGTGCTATCTGATTA    |

ABUW\_1966 P3 TAATCAGATAGCACTTATATTGAATACTTATAAATACTGCTCATAAGACTTATGGTTGGA  
 ABUW\_1966 P4 ATTTATGCGGCCGCGTGAATCTAAACCTGTCCAGAAATAATCC  
 ABUW\_3833 P1 ATTTATGCGGCCGCGTCCAGATGTAATCGTACGTGTACT  
 ABUW\_3833 P2 ATTTGATCCGGTTTTTATGAAGATTTTTAAATGCTTAAAAATCTATACGTAAATATAAG  
 ABUW\_3833 P3 CTTATATTTAACGTATAGATTTTTAAGCATTAAAAATCTTCATAAAAAACCGGATCAAAT  
 ABUW\_3833 P4 ATTTATGCGGCCGCGTGTGACGCTGCAATAACCAAA  
 ABUW\_1763 P1 ATTTATGCGGCCGCGAGCTTATTAAGTTGTGCCGATATGG  
 ABUW\_1763 P2 TAGCTGGGTTTTTATATAAAGGTTTAGATATATTGCTCCTTATTGTCTTGTGA  
 ABUW\_1763 P3 TCACAAGACAATAAGGAGCAATATATCTAAACCTTTATATAAAAAACCCAGCTA  
 ABUW\_1763 P4 ATTTATGCGGCCGCGAGATAAAGAGCTACCTAATCAGACGAT  
 ABUW\_3161 P1 ATTTATGCGGCCGCGTTCGCCTAGTTGTTCCCTCAAGA  
 ABUW\_3161 P2 GCGATGGCATTAGAAAAAACAAGCTGTTTTAAAAAGCCTTAACGTTTTAAAAGTATTCATT  
 ABUW\_3161 P3 AATGAATACTTTTAAACGTTAAGGCTTTTTAAACAGCTTGATTTTCTAATGCCATCGC  
 ABUW\_3161 P4 ATTTATGCGGCCGCGAGTTTTAGGCGATGCTGGTG  
 ABUW\_3180 P1 ATTTATGCGGCCGCGCTGTATGATTTGTGCGGGAGATAGCA  
 ABUW\_3180 P2 TCAGTTATAAATGAACCAATAAAAAAGCACCAACAACAAGAATTACCAGCCCCGCATA  
 ABUW\_3180 P3 TATGCGGGGCTGGTAATTCTTGTGTTGGTGCTTTTTTATTGGTTCATTTATAACTGA  
 ABUW\_3180 P4 ATTTATGCGGCCGCGTCCAGTATTAGCGCACTCCA  
 ABUW\_2590 P1 GTTGGTTCGAGCTGAATATGAAGTG  
 ABUW\_2590 P2 CATCGATATTGATGCTCTCTTTTTTAAATAATGCCTTGTAGCTATAAAAAATCATAGTCAC  
 ABUW\_2590 P3 GTGACTATGATTTTTATAGCTACAAGGCATTATTTAAAAAGAGAGCATCAATATCGATG  
 ABUW\_2590 P4 ACTTCAACAAGCAGAAGCCGAA  
 ABUW\_3122 P1 CTACCTGTAAGTAGGGAAAAGCATGTG  
 ABUW\_3122 P2 TCGATTTCGATAACACGATTAATTTAGACATATTTGCCTGCCCATATTTTTTGTATC  
 ABUW\_3122 P3 GATCAAAAAATATGGGCAGGCAATATGTCTAAATTAATCGTGTATCGAATCGA  
 ABUW\_3122 P4 CTGTGTGCAAGCAACAATCGA  
 ABUW\_1595 P1 TCTACACGTAACCTCCCTAACCGTT  
 ABUW\_1595 P2 TGAGTATGATCAGGCTTTCGTTGAATCTACGGATCTGAACCACGTTATATTGAACATA  
 ABUW\_1595 P3 TATGTTCAATATAACGTGGTTCAGATCCGTAGATTCAACGAAAGCCTGATCATACTCA  
 ABUW\_1595 P4 TACAGTACCTGAAGCAGGGCATT  
 ABUW\_1648 P1 CCAGAAGCGCCACCACCATA  
 ABUW\_1648 P2 AAATAAAATAGATAGCACGCTAACAGTTGTTTCTAGCCAAGGATAGTTGCTTAACTCAGC  
 ABUW\_1648 P3 GCTGAGTTAAGCAACTATCCTTGGCTAGAAACAACCTGTTAGCGTGCTATCTATTTTTATT  
 ABUW\_1648 P4 ACCTTCTCGGCAATTATTAGAAATTTTGGCAT  
 ABUW\_1804 P1 CCAATCTGGATGACGAAAGATTGTTT  
 ABUW\_1804 P2 GCTTTTACAGCGGCTTTTTTAAATTTCTGGTTCTGTTTTCTTATATGAAACAA  
 ABUW\_1804 P3 TTGTTTCATATAAGAAAACGAACCAGAAAATAAAAAGCCGCTGTAAAAGC  
 ABUW\_1804 P4 CGCCTAGCTTGTATGATGCTGTGTTTAA

---

**Complementation Primers**

*gigB* Fwd ATATTAACTAGTCAAGCGTACATTTTTTAGGCTTTTTGGCTA  
*gigB* Rev ATTATTACTAGTTTTTCCCCTTTTCGCTAAGCGTGAT  
*gigC* Fwd ATAAATGGTACCTACCTTTAAACCAATACGCGCAA  
*gigC* Rev ATAATTGGTACCTTAAAGCCTGATCTTCATCGCAA  
*gigD* Fwd ATATTAGGTACCCCTTCTGGCAATGCAAATTCA  
*gigD* Rev ATTTTAGGTACCCTACAGCGGCTTTTGTATAATTTTCTGTAA  
*ptk* Fwd GCTCGTAAGCTAAATGCTGAACATAT  
*ptk* Rev TTAGTCTTCTTTTTGTGCCTTATAGG  
*rseP* Fwd ATTATTGGTACCTAGACAAGCAATGCGTGCG  
*rseP* Rev ATTATTGGTACCTTACAACGCATAAAGTCATTAATAAAGCTAAA  
*typA* Fwd ATTATTGGTACCGCCATAAACGAGGTCAA  
*typA* Rev ATTATTGGTACCTTATTTATCACGGTTACGTTTACGTTTCG  
*uspA* Fwd ATTATTGGTACCGGATACAACATAGGGCAAGGTTT  
*uspA* Rev AATTTTGGTACCTTATTCAGTTACGACCAATACTGGCACA

---
